# Supplementary material for: Discovery of potential therapeutic targets for non-small cell lung cancer using high-throughput metabolomics analysis based on liquid chromatography coupled with tandem mass spectrometry
Source: Royal Society of Chemistry journal article supplement (doi:10.1039/c9ra00987f), 2019-01-01
Supplement: c9ra00987f1.pdf [file c9ra00987f1.pdf]

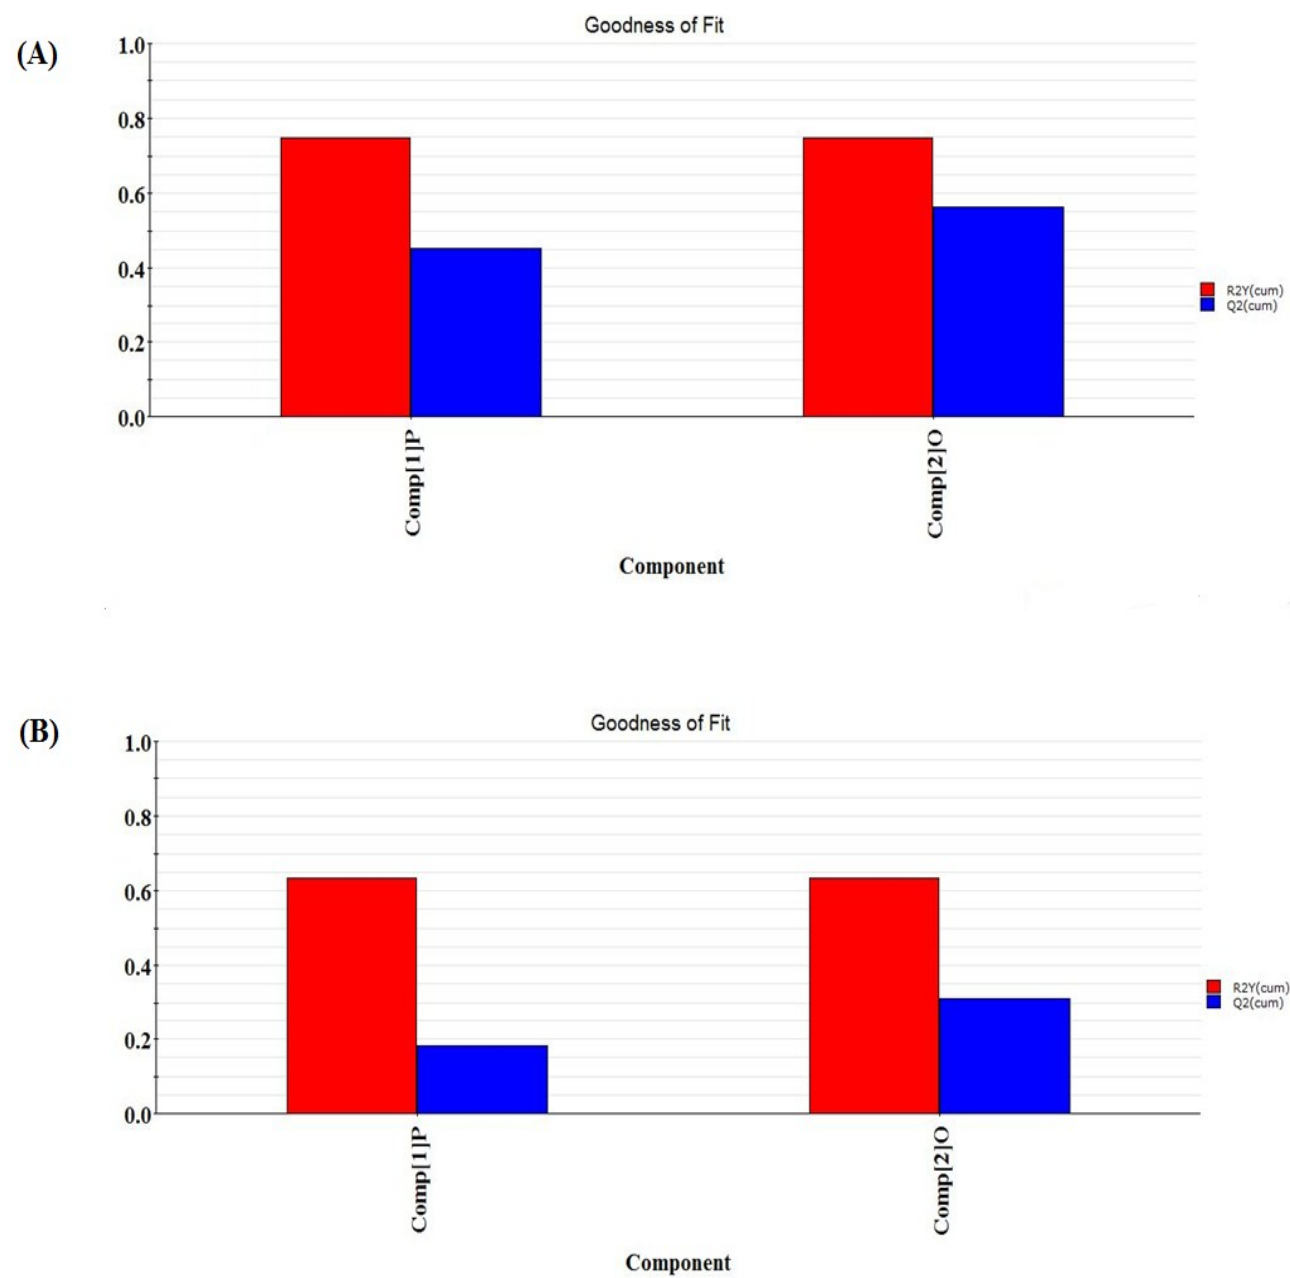

**Figure S1** The permutations plot in positive and negative mode is applied to check the validity and the degree of overfit for the model.

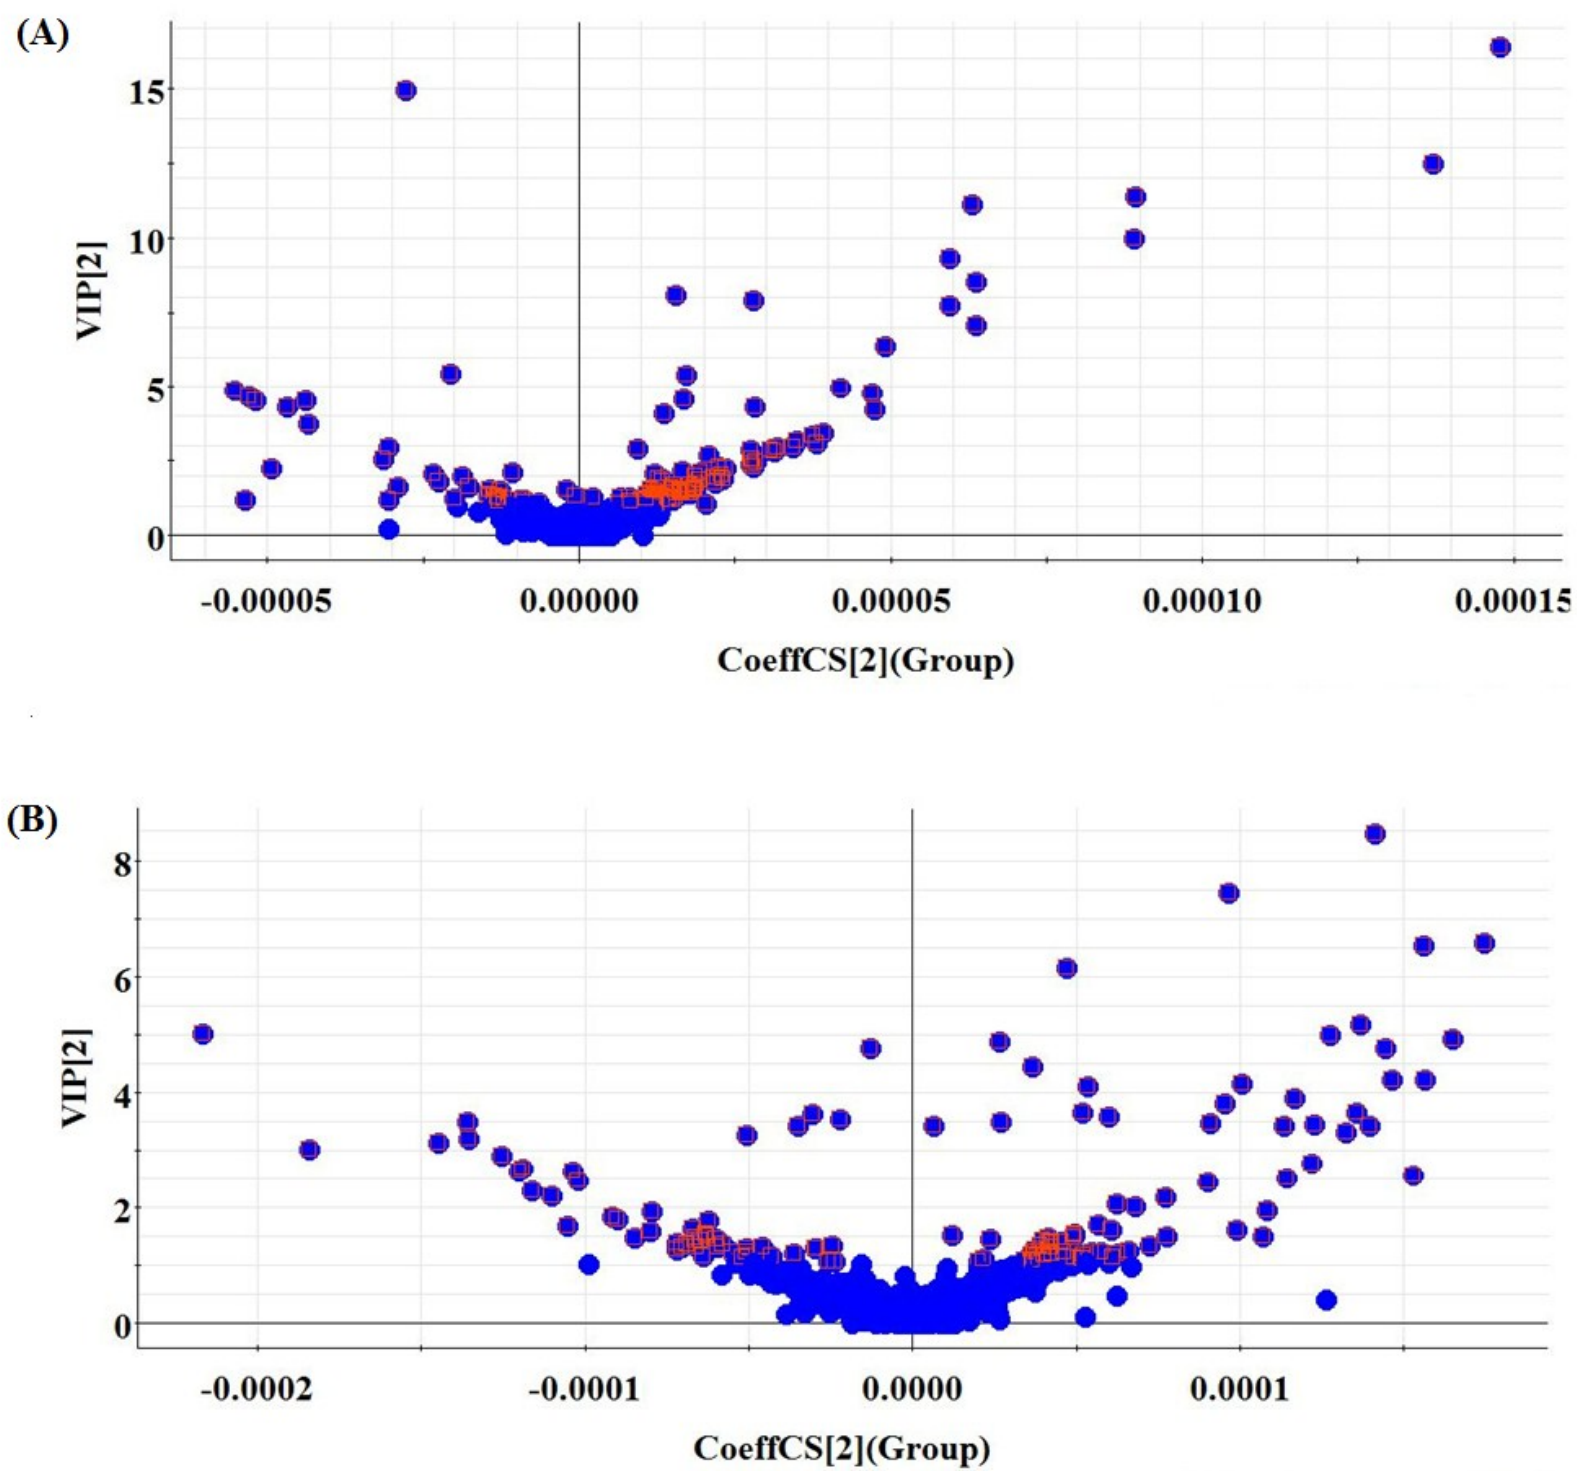

**Figure S2** VIP-plot of OPLS-DA model of UPLC –MS spectra data for control and model group in positive ion mode (A) and negative ion mode (B). □□□□□□□□ □□□□ □

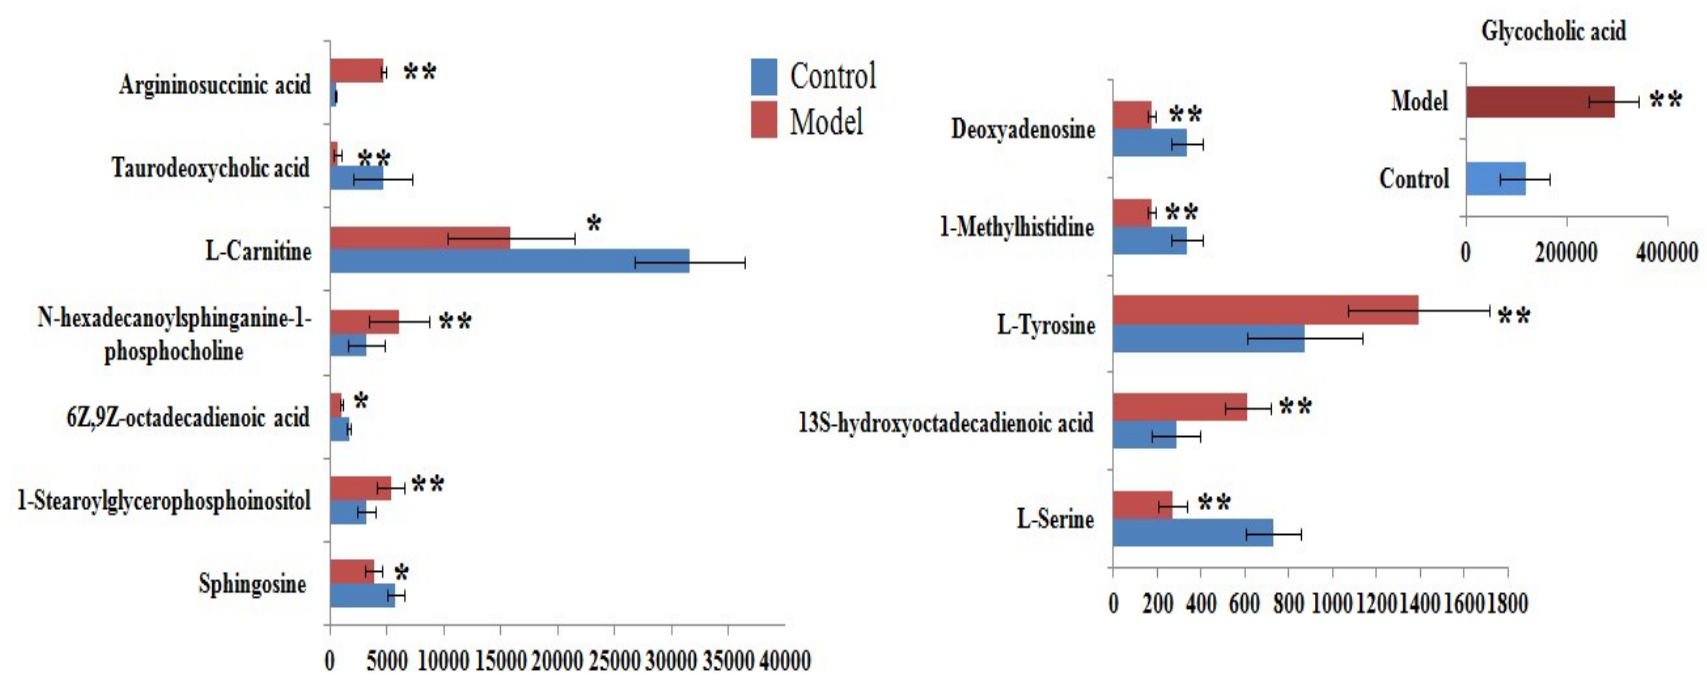

**Figure S3** Relative signal intensities of the cell metabolites identified by UPLC /MS

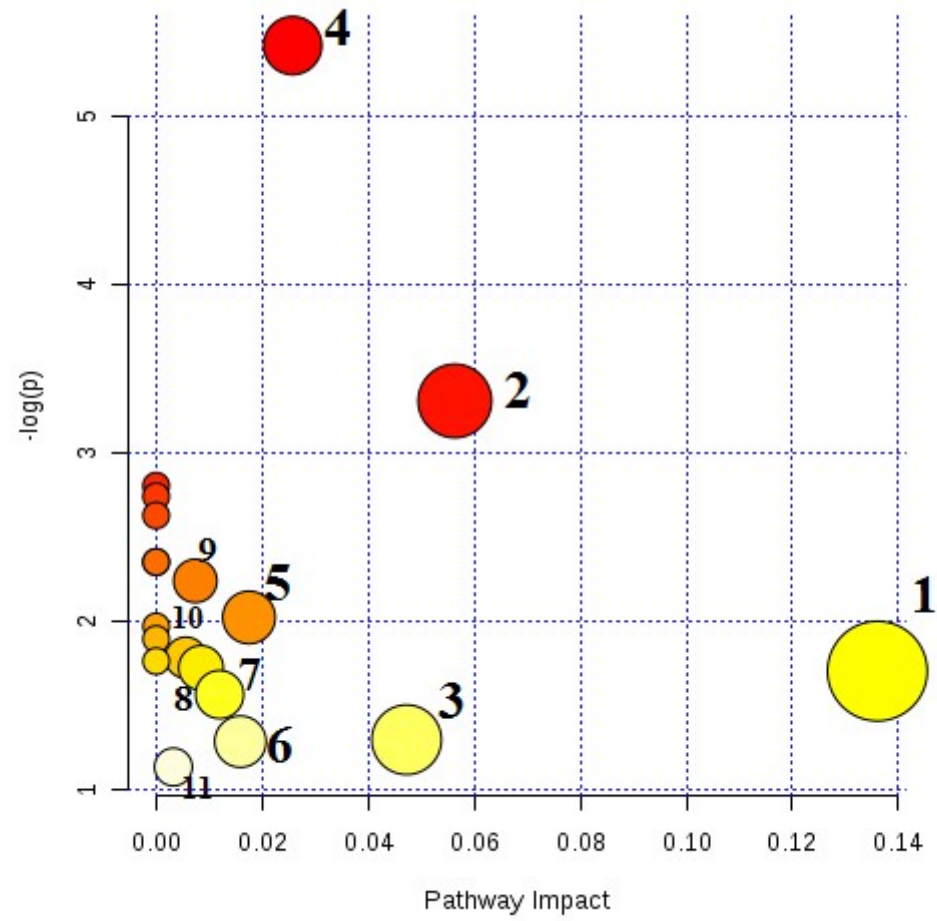

**Figure S4** Altered metabolomic pathways of cell sample in control and model group. 1, Glycine, serine and threonine metabolism; 2, Aminoacyl-tRNA biosynthesis; 3, Tyrosine metabolism; 4, Sphingolipid metabolism; 5, Methane metabolism; 6, Arginine and proline metabolism; 7 Cysteine and methionine metabolism; 8, Primary bile acid biosynthesis; 9, Phenylalanine, tyrosine and tryptophan biosynthesis; 10, Histidine metabolism; 11, Purine metabolism

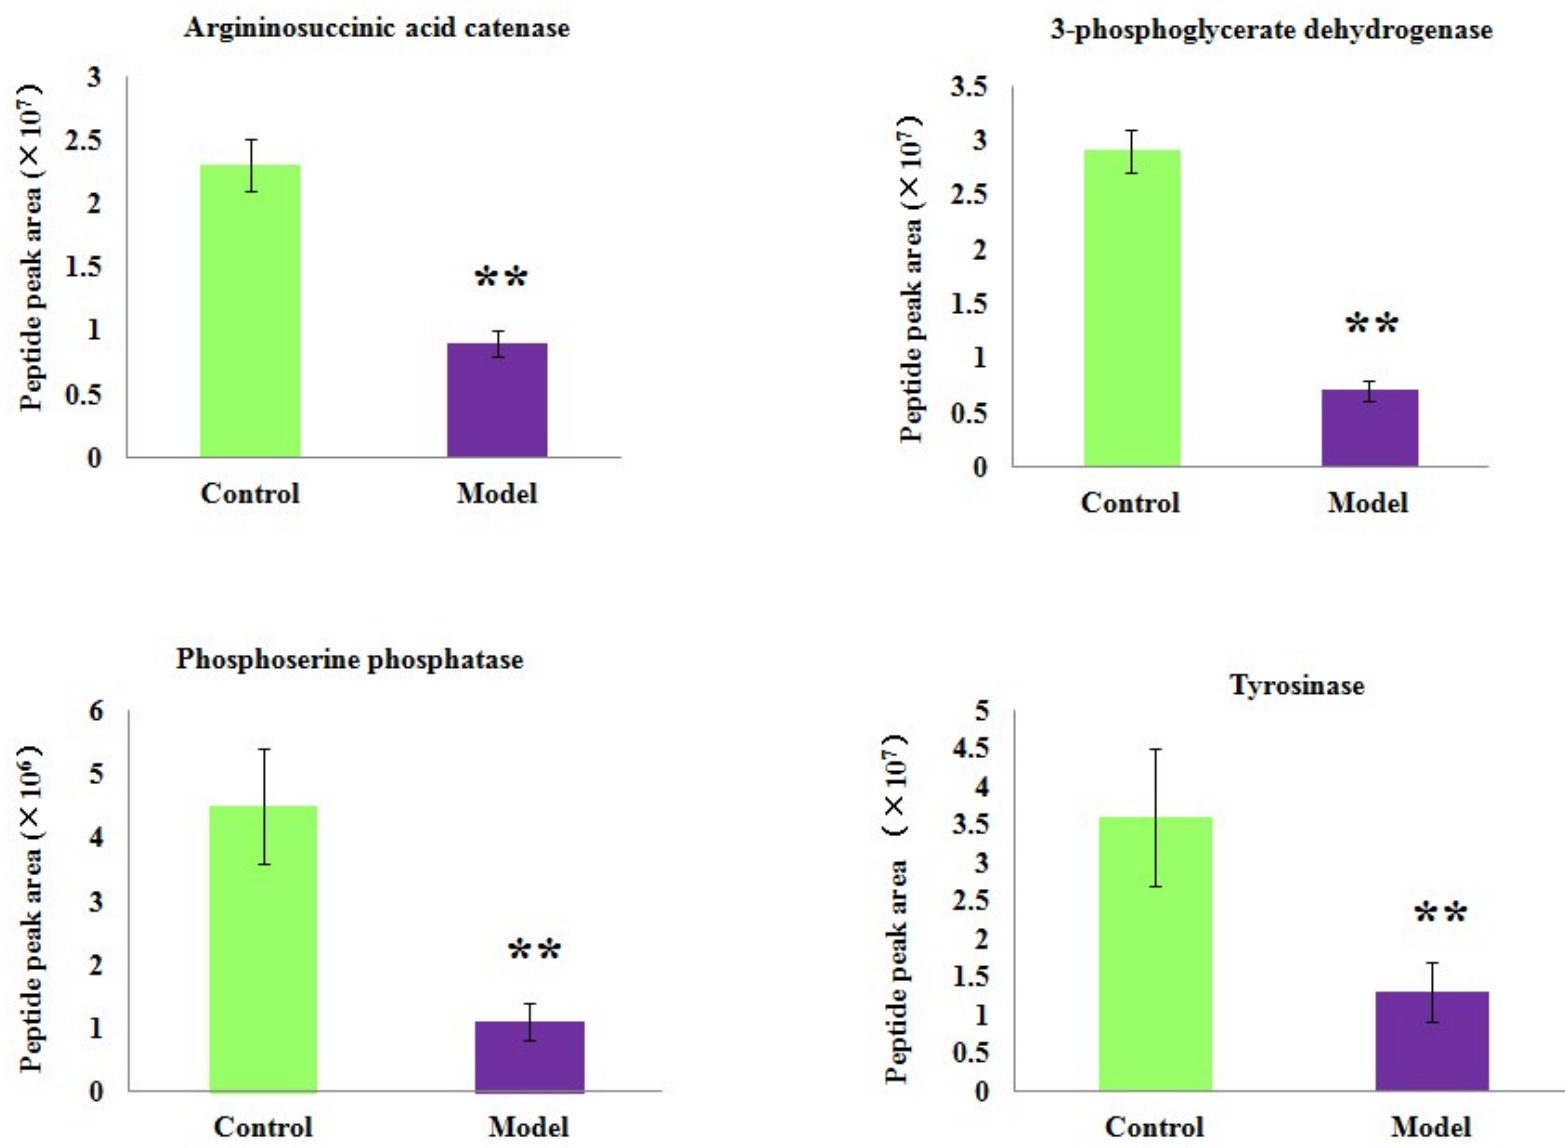

**Figure S5** The changes of key enzymes in the reprogrammed metabolic pathways of SCLCC revealed by targeted proteomics

**Table S1** The differentially expressed metabolites in SCLC cell by cell metabolomics

| No. | Ion form | m/z    | Proposed compound                          | Formula     | Rt(min) | Trends                                                                                |
|-----|----------|--------|--------------------------------------------|-------------|---------|---------------------------------------------------------------------------------------|
| 1   | M+H      | 380.26 | Sphingosine                                | C18H38NO5P  | 4.30    |    |
| 2   | M+H      | 623.32 | 1-Stearoylglycerophosphoinositol           | C27H53O12P  | 6.88    |    |
| 3   | M+H      | 106.05 | L-Serine                                   | C3H7NO3     | 4.97    |    |
| 4   | M-H      | 295.23 | 13S-hydroxyoctadecadienoic acid            | C18H32O3    | 5.36    |    |
| 5   | M-H      | 279.23 | 6Z,9Z-octadecadienoic acid                 | C18H32O2    | 4.98    |    |
| 6   | M-H      | 180.07 | L-Tyrosine                                 | C9H11NO3    | 0.88    |    |
| 7   | M+H      | 170.09 | 1-Methylhistidine                          | C7H11N3O2   | 0.65    |   |
| 8   | M+H      | 705.59 | N-hexadecanoylsphinganine-1-phosphocholine | C39H81N2O6P | 9.58    |  |
| 9   | M+H      | 162.11 | L-Carnitine                                | C7H15NO3    | 0.64    |  |
| 10  | M+H      | 274.09 | Deoxyadenosine                             | C10H13N5O3  | 0.65    |  |
| 11  | M-H      | 464.30 | Glycocholic acid                           | C26H43NO6   | 2.41    |  |
| 12  | M-H      | 498.29 | Taurodeoxycholic acid                      | C26H45NO6S  | 2.72    |  |
| 13  | M+H      | 290.97 | Argininosuccinic acid                      | C10H18N4O6  | 3.11    |  |

Note: Blue logo represents decline, orange logo represents rise.
